# Supplementary material for: Whole genome sequencing of Streptococcus pneumoniae: development, evaluation and verification of targets for serogroup and serotype prediction using an automated pipeline
Source: PeerJ. 2016 Sep 14;4:e2477. doi: 10.7717/peerj.2477 (PMC5028725; doi:10.7717/peerj.2477)
Supplement: Table S5 [file peerj-04-2477-s006.xlsx]

## Sheet: SupplTb5
Supplementary Table 5: Discriminating mutations for genogroup 12A,12B,12F,44,46
Genes	Position	12A	12B	12F	44	46
wcxD	781	[TTG, 260, L]	[TTG, 260, L]	[TTG, 260, L]	[TTG, 260, L]	[ATG, 260, M]
wcxD	793	[TAT, 264, Y]	[TAT, 264, Y]	[TAT, 264, Y]	[TAT, 264, Y]	[CAT, 264, H]
wcxD	805	[TCA, 268, S]	[TCA, 268, S]	[TCA, 268, S]	[TCA, 268, S]	[CCA, 268, P]
wcxD	809	[ATG, 269, M]	[ATG, 269, M]	[ATG, 269, M]	[ATG, 269, M]	[ACT, 269, T]
wcxD	812	[GCA, 270, A]	[GTA, 270, V]	[GTA, 270, V]	[GTA, 270, V]	[GTA, 270, V]
wcxD	845	[GCT, 281, A]	[GCT, 281, A]	[GCT, 281, A]	[GCT, 281, A]	[GTT, 281, V]
wcxF	256	[GCC, 85, A]	[GCC, 85, A]	[GCC, 85, A]	[GCC, 85, A]	[ACC, 85, T]
wcxF	512	[ACG, 170, T]	[ACG, 170, T]	[ATG, 170, M]	[ACG, 170, T]	[ACG, 170, T]
wcxF	560	[CTT, 186, L]	[CTT, 186, L]	[CTT, 186, L]	[CCT, 186, P]	[CTT, 186, L]
wcxF	703	[ATA, 234, I]	[CTA, 234, L]	[CTA, 234, L]	[CTA, 234, L]	[CTA, 234, L]
wcxF	787	[CTA, 262, L]	[CTA, 262, L]	[CTA, 262, L]	[ATA, 262, I]	[CTA, 262, L]
wcxF	889	[GTT, 296, V]	[GTT, 296, V]	[GTT, 296, V]	[GTT, 296, V]	[ATT, 296, I]
wcxF	916	[GGT, 305, G]	[GGT, 305, G]	[GGT, 305, G]	[GCT, 305, A]	[AGT, 305, S]
wcxF	1120	[GCC, 373, A]	[GCC, 373, A]	[GCC, 373, A]	[ACC, 373, T]	[GCC, 373, A]
wzy	251	[ATT, 83, I]	[ACT, 83, T]	[ACT, 83, T]	[ACT, 83, T]	[ACT, 83, T]
