# Supplementary material for: Whole genome sequencing of Streptococcus pneumoniae: development, evaluation and verification of targets for serogroup and serotype prediction using an automated pipeline
Source: PeerJ. 2016 Sep 14;4:e2477. doi: 10.7717/peerj.2477 (PMC5028725; doi:10.7717/peerj.2477)
Supplement: Table S6 [file peerj-04-2477-s007.xlsx]

## Sheet: SupplTb6
Supplementary Table 6: Discriminating mutations for genogroup 25A, 25F and 38
Gene	position	25A	25F	38
wcyD	allele	wcyDα	wcyDα	wcyDβ
wcyV	detected	N	N	Y
wcyC	429	[GCT, 143, A]	[ACT, 143, T]	[GCT, 143, A]
wcyC	465	[ACA, 155, T]	[AAA, 155, K]	[ACA, 155, T]
wcyC	573	[GAA, 191, E]	[GGA, 191, G]	[GAA, 191, E]
wcyC	660	[CGA, 220, R]	[CTA, 220, L]	[CGA, 220, R]
wcyC	891	[ATG, 297, M]	[CTG, 297, L]	[ATG, 297, M]
wcyC	903	[TGG, 301, W]	[CGG, 301, R]	[TGG, 301, W]
