# Supplementary material for: Whole genome sequencing of Streptococcus pneumoniae: development, evaluation and verification of targets for serogroup and serotype prediction using an automated pipeline
Source: PeerJ. 2016 Sep 14;4:e2477. doi: 10.7717/peerj.2477 (PMC5028725; doi:10.7717/peerj.2477)
Supplement: Table S10 [file peerj-04-2477-s011.xlsx]

## Sheet: SupplTb10
Supplementary Table 10: Failed isolates
Wetlab_Serotype	Wetlab-retested	%Coverage_hit1	Hit1	%Coverage_hit2	Hit2
29	?35B	0.7956	29	0.5622	35B
36	NTR	0.8434	36	0.3656	19F
10F	10F	0.6042	35B	0.5372	33B
15B	15B	0.74	15B	0.7397	15C
15C	15B/C	0.8452	15C	0.8451	15B
23F	NTR	0.836	23B	0.8318	23F
23F	23F	0.8575	23B	0.8425	23F
33C	33C	0.7917	33C	0.6299	33B
